# Supplementary material for: Sex difference contributes to phenotypic diversity in individuals with neurodevelopmental disorders
Source: Front Pediatr. 2023 Aug 7;11:1172154. doi: 10.3389/fped.2023.1172154 (PMC10441218; doi:10.3389/fped.2023.1172154)
Supplement: Supplementary file 1 [file Table1.xlsx]

## Sheet: IDMR + GDD gene list
Gene_Name	ensembl_gene_id	chromosome_name
A2ML1	ENSG00000166535	12
AAAS	ENSG00000094914	12
AAR2	ENSG00000131043	20
AARS1	ENSG00000090861	16
AASS	ENSG00000008311	7
ABAT	ENSG00000183044	16
ABCA2	ENSG00000107331	9
ABCA4	ENSG00000198691	1
ABCA7	ENSG00000064687	19
ABCB7	ENSG00000131269	X
ABCC8	ENSG00000006071	11
ABCC9	ENSG00000069431	12
ABCD1	ENSG00000101986	X
ABCD4	ENSG00000119688	14
ABHD16A	ENSG00000204427	6
ABHD5	ENSG00000011198	3
ACAD9	ENSG00000177646	3
ACADM	ENSG00000117054	1
ACADS	ENSG00000122971	12
ACADSB	ENSG00000196177	10
ACAT1	ENSG00000075239	11
ACAT2	ENSG00000120437	6
ACBD6	ENSG00000230124	1
ACD	ENSG00000102977	16
ACER3	ENSG00000078124	11
ACHE	ENSG00000087085	7
ACO2	ENSG00000100412	22
ACOX1	ENSG00000161533	17
ACOX2	ENSG00000168306	3
ACP5	ENSG00000102575	19
ACSF3	ENSG00000176715	16
ACSL4	ENSG00000068366	X
ACTA1	ENSG00000143632	1
ACTA2	ENSG00000107796	10
ACTB	ENSG00000075624	7
ACTG1	ENSG00000184009	17
ACTL6A	ENSG00000136518	3
ACTL6B	ENSG00000077080	7
ACVR1	ENSG00000115170	2
ACY1	ENSG00000243989	3
ADA	ENSG00000196839	20
ADAM22	ENSG00000008277	7
ADAMTS10	ENSG00000142303	19
ADAMTS3	ENSG00000156140	4
ADAMTSL2	ENSG00000197859	9
ADAR	ENSG00000160710	1
ADARB1	ENSG00000197381	21
ADAT3	ENSG00000213638	19
ADCY5	ENSG00000173175	3
ADD3	ENSG00000148700	10
ADGRB3	ENSG00000135298	6
ADGRG1	ENSG00000205336	16
ADGRG6	ENSG00000112414	6
ADGRL1	ENSG00000072071	19
ADK	ENSG00000156110	10
ADNP	ENSG00000101126	20
ADPRS	ENSG00000116863	1
ADRA2B	ENSG00000274286	2
ADSL	ENSG00000239900	22
AFF2	ENSG00000155966	X
AFF3	ENSG00000144218	2
AFF4	ENSG00000072364	5
AFG3L2	ENSG00000141385	18
AGA	ENSG00000038002	4
AGAP1	ENSG00000157985	2
AGBL5	ENSG00000084693	2
AGFG1	ENSG00000173744	2
AGGF1	ENSG00000164252	5
AGL	ENSG00000162688	1
AGMO	ENSG00000187546	7
AGO1	ENSG00000092847	1
AGO2	ENSG00000123908	8
AGPAT2	ENSG00000169692	9
AGRN	ENSG00000188157	1
AGTPBP1	ENSG00000135049	9
AGTR2	ENSG00000180772	X
AHCY	ENSG00000101444	20
AHDC1	ENSG00000126705	1
AHI1	ENSG00000135541	6
AHR	ENSG00000106546	7
AHSG	ENSG00000145192	3
AIFM1	ENSG00000156709	X
AIMP1	ENSG00000164022	4
AIMP2	ENSG00000106305	7
AIPL1	ENSG00000129221	17
AK1	ENSG00000106992	9
AKAP6	ENSG00000151320	14
AKT1	ENSG00000142208	14
AKT3	ENSG00000117020	1
ALB	ENSG00000163631	4
ALDH18A1	ENSG00000059573	10
ALDH1A3	ENSG00000184254	15
ALDH3A2	ENSG00000072210	17
ALDH4A1	ENSG00000159423	1
ALDH5A1	ENSG00000112294	6
ALDH6A1	ENSG00000119711	14
ALDH7A1	ENSG00000164904	5
ALDOA	ENSG00000149925	16
ALDOB	ENSG00000136872	9
ALG1	ENSG00000033011	16
ALG11	ENSG00000253710	13
ALG12	ENSG00000182858	22
ALG13	ENSG00000101901	X
ALG14	ENSG00000172339	1
ALG2	ENSG00000119523	9
ALG3	ENSG00000214160	3
ALG6	ENSG00000088035	1
ALG8	ENSG00000159063	11
ALG9	ENSG00000086848	11
ALKBH8	ENSG00000137760	11
ALMS1	ENSG00000116127	2
ALOX12B	ENSG00000179477	17
ALOXE3	ENSG00000179148	17
ALX1	ENSG00000180318	12
ALX3	ENSG00000156150	1
ALX4	ENSG00000052850	11
AMER1	ENSG00000184675	X
AMMEC	NA	NA
AMMECR1	ENSG00000101935	X
AMPD2	ENSG00000116337	1
AMT	ENSG00000145020	3
ANK1	ENSG00000029534	8
ANK2	ENSG00000145362	4
ANK3	ENSG00000151150	10
ANKH	ENSG00000154122	5
ANKLE2	ENSG00000176915	12
ANKRD11	ENSG00000167522	16
ANKRD17	ENSG00000132466	4
ANO10	ENSG00000160746	3
ANO5	ENSG00000171714	11
ANTXR1	ENSG00000169604	2
AP1B1	ENSG00000100280	22
AP1G1	ENSG00000166747	16
AP1S1	ENSG00000106367	7
AP1S2	ENSG00000182287	X
AP2M1	ENSG00000161203	3
AP2S1	ENSG00000042753	19
AP3B1	ENSG00000132842	5
AP3B2	ENSG00000103723	15
AP4B1	ENSG00000134262	1
AP4E1	ENSG00000081014	15
AP4M1	ENSG00000221838	7
AP4S1	ENSG00000100478	14
AP5Z1	ENSG00000242802	7
APBA2	ENSG00000034053	15
APC	ENSG00000134982	5
APC2	ENSG00000115266	19
APOE	ENSG00000130203	19
APP	ENSG00000142192	21
APTX	ENSG00000137074	9
AQP2	ENSG00000167580	12
AQP4	ENSG00000171885	18
AR	ENSG00000169083	X
ARCN1	ENSG00000095139	11
ARF1	ENSG00000143761	1
ARF3	ENSG00000134287	12
ARFGEF1	ENSG00000066777	8
ARFGEF2	ENSG00000124198	20
ARG1	ENSG00000118520	6
ARHGAP31	ENSG00000031081	3
ARHGDIA	ENSG00000141522	17
ARHGEF18	ENSG00000104880	19
ARHGEF2	ENSG00000116584	1
ARHGEF6	ENSG00000129675	X
ARHGEF7	ENSG00000102606	13
ARHGEF9	ENSG00000131089	X
ARID1A	ENSG00000117713	1
ARID1B	ENSG00000049618	6
ARID2	ENSG00000189079	12
ARL13B	ENSG00000169379	3
ARL14EP	ENSG00000152219	11
ARL2BP	ENSG00000102931	16
ARL3	ENSG00000138175	10
ARL6	ENSG00000113966	3
ARMC9	ENSG00000135931	2
ARNT2	ENSG00000172379	15
ARSA	ENSG00000100299	22
ARSL	ENSG00000157399	X
ARV1	ENSG00000173409	1
ARVCF	ENSG00000099889	22
ARX	ENSG00000004848	X
ASAH1	ENSG00000104763	8
ASCC1	ENSG00000138303	10
ASCC3	ENSG00000112249	6
ASCL1	ENSG00000139352	12
ASH1L	ENSG00000116539	1
ASL	ENSG00000126522	7
ASNS	ENSG00000070669	7
ASPA	ENSG00000108381	17
ASPM	ENSG00000066279	1
ASS1	ENSG00000130707	9
ASTN1	ENSG00000152092	1
ASXL1	ENSG00000171456	20
ASXL2	ENSG00000143970	2
ASXL3	ENSG00000141431	18
ATAD1	ENSG00000138138	10
ATAD3A	ENSG00000197785	1
ATCAY	ENSG00000167654	19
ATG5	ENSG00000057663	6
ATG7	ENSG00000197548	3
ATIC	ENSG00000138363	2
ATL1	ENSG00000198513	14
ATM	ENSG00000149311	11
ATN1	ENSG00000111676	12
ATP10A	ENSG00000206190	15
ATP13A2	ENSG00000159363	1
ATP1A1	ENSG00000163399	1
ATP1A2	ENSG00000018625	1
ATP1A3	ENSG00000105409	19
ATP2A2	ENSG00000174437	12
ATP2B1	ENSG00000070961	12
ATP5F1E	ENSG00000124172	20
ATP6	ENSG00000198899	MT
ATP6AP1	ENSG00000071553	X
ATP6AP2	ENSG00000182220	X
ATP6V0A1	ENSG00000033627	17
ATP6V0A2	ENSG00000185344	12
ATP6V0C	ENSG00000185883	16
ATP6V1A	ENSG00000114573	3
ATP6V1B2	ENSG00000147416	8
ATP6V1E1	ENSG00000131100	22
ATP7A	ENSG00000165240	X
ATP7B	ENSG00000123191	13
ATP8A2	ENSG00000132932	13
ATP9A	ENSG00000054793	20
ATPAF2	ENSG00000171953	17
ATR	ENSG00000175054	3
ATRIP	ENSG00000164053	3
ATRX	ENSG00000085224	X
ATXN2L	ENSG00000168488	16
ATXN7	ENSG00000163635	3
AUH	ENSG00000148090	9
AUTS2	ENSG00000158321	7
AVPR2	ENSG00000126895	X
B3GALNT2	ENSG00000162885	1
B3GALT6	ENSG00000176022	1
B3GALTL	ENSG00000187676	13
B3GLCT	ENSG00000187676	13
B4GALNT1	ENSG00000135454	12
B4GALT1	ENSG00000086062	9
B4GALT7	ENSG00000027847	5
B4GAT1	ENSG00000174684	11
B9D1	ENSG00000108641	17
BAZ1B	ENSG00000009954	7
BBIP1	ENSG00000214413	10
BBS1	ENSG00000174483	11
BBS10	ENSG00000179941	12
BBS12	ENSG00000181004	4
BBS2	ENSG00000125124	16
BBS4	ENSG00000140463	15
BBS5	ENSG00000163093	2
BBS7	ENSG00000138686	4
BBS9	ENSG00000122507	7
BCAP31	ENSG00000185825	X
BCAS3	ENSG00000141376	17
BCHE	ENSG00000114200	3
BCKDHA	ENSG00000248098	19
BCKDHB	ENSG00000083123	6
BCKDK	ENSG00000103507	16
BCL11A	ENSG00000119866	2
BCL11B	ENSG00000127152	14
BCOR	ENSG00000183337	X
BCORL1	ENSG00000085185	X
BCR	ENSG00000186716	22
BCS1L	ENSG00000074582	2
BDNF	ENSG00000176697	11
BEST1	ENSG00000167995	11
BICD2	ENSG00000185963	9
BICRA	ENSG00000063169	19
BIN1	ENSG00000136717	2
BLM	ENSG00000197299	15
BMP2	ENSG00000125845	20
BMP4	ENSG00000125378	14
BMPER	ENSG00000164619	7
BMPR1A	ENSG00000107779	10
BOD1	ENSG00000145919	5
BOLA3	ENSG00000163170	2
BORCS5	ENSG00000165714	12
BPTF	ENSG00000171634	17
BRAF	ENSG00000157764	7
BRAT1	ENSG00000106009	7
BRCA1	ENSG00000012048	17
BRCA2	ENSG00000139618	13
BRD4	ENSG00000141867	19
BRF1	ENSG00000185024	14
BRIP1	ENSG00000136492	17
BRPF1	ENSG00000156983	3
BRSK2	ENSG00000174672	11
BRWD3	ENSG00000165288	X
BSCL2	ENSG00000168000	11
BSND	ENSG00000162399	1
BTD	ENSG00000169814	3
BUB1	ENSG00000169679	2
BUB1B	ENSG00000156970	15
BUB3	ENSG00000154473	10
C12ORF4	ENSG00000047621	12
C12orf4	ENSG00000047621	12
C12orf57	ENSG00000111678	12
C12orf65	ENSG00000130921	12
C22orf31	ENSG00000100249	22
C2CD3	ENSG00000168014	11
CA2	ENSG00000104267	8
CA4	ENSG00000167434	17
CA8	ENSG00000178538	8
CACNA1A	ENSG00000141837	19
CACNA1B	ENSG00000148408	9
CACNA1C	ENSG00000151067	12
CACNA1D	ENSG00000157388	3
CACNA1E	ENSG00000198216	1
CACNA1G	ENSG00000006283	17
CACNA1H	ENSG00000196557	16
CACNA1I	ENSG00000100346	22
CACNA2D1	ENSG00000153956	7
CACNA2D2	ENSG00000007402	3
CACNB4	ENSG00000182389	2
CACNG2	ENSG00000166862	22
CACNG7	ENSG00000105605	19
CAD	ENSG00000084774	2
CADPS2	ENSG00000081803	7
CALY	ENSG00000130643	10
CAMK2A	ENSG00000070808	5
CAMK2B	ENSG00000058404	7
CAMK2G	ENSG00000148660	10
CAMK4	ENSG00000152495	5
CAMKMT	ENSG00000143919	2
CAMTA1	ENSG00000171735	1
CANT1	ENSG00000171302	17
CAPN10	ENSG00000142330	2
CAPN15	ENSG00000103326	16
CAPN3	ENSG00000092529	15
CAPZA2	ENSG00000198898	7
CARNMT1	ENSG00000156017	9
CARS1	ENSG00000110619	11
CARS2	ENSG00000134905	13
CASK	ENSG00000147044	X
CASP2	ENSG00000106144	7
CASR	ENSG00000036828	3
CAV1	ENSG00000105974	7
CBL	ENSG00000110395	11
CBS	ENSG00000160200	21
CC2D1A	ENSG00000132024	19
CC2D2A	ENSG00000048342	4
CCBE1	ENSG00000183287	18
CCDC115	ENSG00000136710	2
CCDC174	ENSG00000154781	3
CCDC22	ENSG00000101997	X
CCDC32	ENSG00000128891	15
CCDC47	ENSG00000108588	17
CCDC88A	ENSG00000115355	2
CCDC88C	ENSG00000015133	14
CCNA2	ENSG00000145386	4
CCND2	ENSG00000118971	12
CCNK	ENSG00000090061	14
CD96	ENSG00000153283	3
CDC42	ENSG00000070831	1
CDC42BPB	ENSG00000198752	14
CDC45	ENSG00000093009	22
CDC6	ENSG00000094804	17
CDCA7	ENSG00000144354	2
CDH11	ENSG00000140937	16
CDH15	ENSG00000129910	16
CDH2	ENSG00000170558	18
CDH23	ENSG00000107736	10
CDHR1	ENSG00000148600	10
CDK10	ENSG00000185324	16
CDK13	ENSG00000065883	7
CDK16	ENSG00000102225	X
CDK19	ENSG00000155111	6
CDK5	ENSG00000164885	7
CDK5R1	ENSG00000176749	17
CDK5RAP2	ENSG00000136861	9
CDK6	ENSG00000105810	7
CDK8	ENSG00000132964	13
CDKL5	ENSG00000008086	X
CDKN1C	ENSG00000129757	11
CDON	ENSG00000064309	11
CDT1	ENSG00000167513	16
CELF2	ENSG00000048740	10
CENPE	ENSG00000138778	4
CENPF	ENSG00000117724	1
CENPJ	ENSG00000151849	13
CEP104	ENSG00000116198	1
CEP120	ENSG00000168944	5
CEP135	ENSG00000174799	4
CEP152	ENSG00000103995	15
CEP164	ENSG00000110274	11
CEP19	ENSG00000174007	3
CEP290	ENSG00000198707	12
CEP41	ENSG00000106477	7
CEP57	ENSG00000166037	11
CEP63	ENSG00000182923	3
CEP83	ENSG00000173588	12
CEP85L	ENSG00000111860	6
CEP89	ENSG00000121289	19
CERKL	ENSG00000188452	2
CERS1	ENSG00000223802	19
CERT1	ENSG00000113163	5
CFAP418	ENSG00000156172	8
CHAF1B	ENSG00000159259	21
CHAMP1	ENSG00000198824	13
CHAT	ENSG00000070748	10
CHD1	ENSG00000153922	5
CHD2	ENSG00000173575	15
CHD3	ENSG00000170004	17
CHD4	ENSG00000111642	12
CHD5	ENSG00000116254	1
CHD7	ENSG00000171316	8
CHD8	ENSG00000100888	14
CHKB	ENSG00000100288	22
CHL1	ENSG00000134121	3
CHM	ENSG00000188419	X
CHMP1A	ENSG00000131165	16
CHN1	ENSG00000128656	2
CHRM1	ENSG00000168539	11
CHRM3	ENSG00000133019	1
CHRNA2	ENSG00000120903	8
CHRNA4	ENSG00000101204	20
CHRNA7	ENSG00000175344	15
CHRNB2	ENSG00000160716	1
CHST14	ENSG00000169105	15
CHSY1	ENSG00000131873	15
CIB2	ENSG00000136425	15
CIC	ENSG00000079432	19
CIP2A	ENSG00000163507	3
CISD2	ENSG00000145354	4
CIT	ENSG00000122966	12
CKAP2L	ENSG00000169607	2
CLCN2	ENSG00000114859	3
CLCN3	ENSG00000109572	4
CLCN4	ENSG00000073464	X
CLCN6	ENSG00000011021	1
CLCNKA	ENSG00000186510	1
CLCNKB	ENSG00000184908	1
CLDN11	ENSG00000013297	3
CLIC2	ENSG00000155962	X
CLIP1	ENSG00000130779	12
CLIP2	ENSG00000106665	7
CLN3	ENSG00000188603	16
CLN5	ENSG00000102805	13
CLN6	ENSG00000128973	15
CLN8	ENSG00000182372	8
CLP1	ENSG00000172409	11
CLPB	ENSG00000162129	11
CLRN1	ENSG00000163646	3
CLTC	ENSG00000141367	17
CLTCL1	ENSG00000070371	22
CNGA1	ENSG00000198515	4
CNGB1	ENSG00000070729	16
CNKSR1	ENSG00000142675	1
CNKSR2	ENSG00000149970	X
CNNM2	ENSG00000148842	10
CNOT1	ENSG00000125107	16
CNOT2	ENSG00000111596	12
CNOT3	ENSG00000088038	19
CNPY3	ENSG00000137161	6
CNTN2	ENSG00000184144	1
CNTN4	ENSG00000144619	3
CNTN5	ENSG00000149972	11
CNTNAP1	ENSG00000108797	17
CNTNAP2	ENSG00000174469	7
COA8	ENSG00000256053	14
COASY	ENSG00000068120	17
COG1	ENSG00000166685	17
COG2	ENSG00000135775	1
COG4	ENSG00000103051	16
COG5	ENSG00000164597	7
COG6	ENSG00000133103	13
COG7	ENSG00000168434	16
COG8	ENSG00000213380	16
COL11A2	ENSG00000204248	6
COL13A1	ENSG00000197467	10
COL18A1	ENSG00000182871	21
COL1A1	ENSG00000108821	17
COL1A2	ENSG00000164692	7
COL2A1	ENSG00000139219	12
COL3A1	ENSG00000168542	2
COL4A1	ENSG00000187498	13
COL4A2	ENSG00000134871	13
COL4A3BP	ENSG00000113163	5
COL9A2	ENSG00000049089	1
COL9A3	ENSG00000092758	20
COLEC10	ENSG00000184374	8
COLEC11	ENSG00000118004	2
COLQ	ENSG00000206561	3
COMT	ENSG00000093010	22
COPB1	ENSG00000129083	11
COPB2	ENSG00000184432	3
COQ2	ENSG00000173085	4
COQ4	ENSG00000167113	9
COQ5	ENSG00000110871	12
COQ7	ENSG00000167186	16
COQ8A	ENSG00000163050	1
COQ9	ENSG00000088682	16
CORO1A	ENSG00000102879	16
COX10	ENSG00000006695	17
COX14	ENSG00000178449	12
COX15	ENSG00000014919	10
COX20	ENSG00000203667	1
COX4I2	ENSG00000131055	20
COX6B1	ENSG00000126267	19
COX7B	ENSG00000131174	X
COX8A	ENSG00000176340	11
CP	ENSG00000047457	3
CPA6	ENSG00000165078	8
CPE	ENSG00000109472	4
CPLANE1	ENSG00000197603	5
CPLX1	ENSG00000168993	4
CPS1	ENSG00000021826	2
CRADD	ENSG00000169372	12
CRB1	ENSG00000134376	1
CRB2	ENSG00000148204	9
CRBN	ENSG00000113851	3
CREBBP	ENSG00000005339	16
CRIPT	ENSG00000119878	2
CRKL	ENSG00000099942	22
CRLF1	ENSG00000006016	19
CRPPA	ENSG00000214960	7
CRX	ENSG00000105392	19
CSDE1	ENSG00000009307	1
CSNK1G1	ENSG00000169118	15
CSNK2A1	ENSG00000101266	20
CSNK2B	ENSG00000204435	6
CSPP1	ENSG00000104218	8
CSTB	ENSG00000160213	21
CTBP1	ENSG00000159692	4
CTC1	ENSG00000178971	17
CTCF	ENSG00000102974	16
CTDP1	ENSG00000060069	18
CTNNA2	ENSG00000066032	2
CTNNB1	ENSG00000168036	3
CTNND1	ENSG00000198561	11
CTNND2	ENSG00000169862	5
CTSA	ENSG00000064601	20
CTSD	ENSG00000117984	11
CTSF	ENSG00000174080	11
CTTNBP2	ENSG00000077063	7
CUL3	ENSG00000036257	2
CUL4B	ENSG00000158290	X
CUX1	ENSG00000257923	7
CUX2	ENSG00000111249	12
CWC27	ENSG00000153015	5
CWF19L1	ENSG00000095485	10
CYB5A	ENSG00000166347	18
CYB5R3	ENSG00000100243	22
CYFIP1	ENSG00000273749	15
CYFIP2	ENSG00000055163	5
CYP24A1	ENSG00000019186	20
CYP26B1	ENSG00000003137	2
CYP27A1	ENSG00000135929	2
CYP2U1	ENSG00000155016	4
D2HGDH	ENSG00000180902	2
DACT1	ENSG00000165617	14
DAG1	ENSG00000173402	3
DARS1	ENSG00000115866	2
DARS2	ENSG00000117593	1
DBT	ENSG00000137992	1
DCAF17	ENSG00000115827	2
DCC	ENSG00000187323	18
DCHS1	ENSG00000166341	11
DCPS	ENSG00000110063	11
DCX	ENSG00000077279	X
DDB1	ENSG00000167986	11
DDB2	ENSG00000134574	11
DDC	ENSG00000132437	7
DDHD2	ENSG00000085788	8
DDOST	ENSG00000244038	1
DDR2	ENSG00000162733	1
DDX11	ENSG00000013573	12
DDX23	ENSG00000174243	12
DDX3X	ENSG00000215301	X
DDX47	ENSG00000213782	12
DDX54	ENSG00000123064	12
DDX59	ENSG00000118197	1
DDX6	ENSG00000110367	11
DEAF1	ENSG00000177030	11
DEGS1	ENSG00000143753	1
DENND5A	ENSG00000184014	11
DEPDC5	ENSG00000100150	22
DGCR2	ENSG00000070413	22
DGCR6	ENSG00000183628	22
DGCR8	ENSG00000128191	22
DHCR24	ENSG00000116133	1
DHCR7	ENSG00000172893	11
DHDDS	ENSG00000117682	1
DHFR	ENSG00000228716	5
DHPS	ENSG00000095059	19
DHTKD1	ENSG00000181192	10
DHX16	ENSG00000204560	6
DHX30	ENSG00000132153	3
DHX34	ENSG00000134815	19
DHX37	ENSG00000150990	12
DIAPH1	ENSG00000131504	5
DICER1	ENSG00000100697	14
DIO2	ENSG00000211448	14
DIP2B	ENSG00000066084	12
DIS3L2	ENSG00000144535	2
DISC1	ENSG00000162946	1
DISP1	ENSG00000154309	1
DKC1	ENSG00000130826	X
DLAT	ENSG00000150768	11
DLD	ENSG00000091140	7
DLG2	ENSG00000150672	11
DLG3	ENSG00000082458	X
DLG4	ENSG00000132535	17
DLK1	ENSG00000185559	14
DLL1	ENSG00000198719	6
DLL3	ENSG00000090932	19
DLL4	ENSG00000128917	15
DLX5	ENSG00000105880	7
DMD	ENSG00000198947	X
DMPK	ENSG00000104936	19
DMXL2	ENSG00000104093	15
DNA2	ENSG00000138346	10
DNAH3	ENSG00000158486	16
DNAJA1	ENSG00000086061	9
DNAJC12	ENSG00000108176	10
DNAJC19	ENSG00000205981	3
DNAJC21	ENSG00000168724	5
DNAJC3	ENSG00000102580	13
DNAJC6	ENSG00000116675	1
DNAL4	ENSG00000100246	22
DNM1	ENSG00000106976	9
DNM1L	ENSG00000087470	12
DNMT3A	ENSG00000119772	2
DNMT3B	ENSG00000088305	20
DOCK3	ENSG00000088538	3
DOCK6	ENSG00000130158	19
DOCK7	ENSG00000116641	1
DOCK8	ENSG00000107099	9
DOHH	ENSG00000129932	19
DOLK	ENSG00000175283	9
DONSON	ENSG00000159147	21
DPAGT1	ENSG00000172269	11
DPF2	ENSG00000133884	11
DPH1	ENSG00000108963	17
DPM1	ENSG00000000419	20
DPM2	ENSG00000136908	9
DPM3	ENSG00000179085	1
DPP6	ENSG00000130226	7
DPYD	ENSG00000188641	1
DPYS	ENSG00000147647	8
DPYSL5	ENSG00000157851	2
DRD2	ENSG00000149295	11
DRD4	ENSG00000069696	11
DSCAM	ENSG00000171587	21
DSCAML1	ENSG00000177103	11
DSG4	ENSG00000175065	18
DST	ENSG00000151914	6
DTYMK	ENSG00000168393	2
DUOX2	ENSG00000140279	15
DUOXA2	ENSG00000140274	15
DVL1	ENSG00000107404	1
DVL3	ENSG00000161202	3
DYM	ENSG00000141627	18
DYNC1H1	ENSG00000197102	14
DYNC1I2	ENSG00000077380	2
DYNC2H1	ENSG00000187240	11
DYNC2LI1	ENSG00000138036	2
DYRK1A	ENSG00000157540	21
EARS2	ENSG00000103356	16
EBF3	ENSG00000108001	10
EBP	ENSG00000147155	X
ECE1	ENSG00000117298	1
ECHS1	ENSG00000127884	10
EDC3	ENSG00000179151	15
EDEM3	ENSG00000116406	1
EDN3	ENSG00000124205	20
EDNRB	ENSG00000136160	13
EED	ENSG00000074266	11
EEF1A2	ENSG00000101210	20
EEF1B2	ENSG00000114942	2
EEF1D	ENSG00000104529	8
EFL1	ENSG00000140598	15
EFNB1	ENSG00000090776	X
EFNB2	ENSG00000125266	13
EFTUD2	ENSG00000108883	17
EGF	ENSG00000138798	4
EHMT1	ENSG00000181090	9
EI24	ENSG00000149547	11
EIF2AK2	ENSG00000055332	2
EIF2AK3	ENSG00000172071	2
EIF2S3	ENSG00000130741	X
EIF3F	ENSG00000175390	11
EIF4A3	ENSG00000141543	17
EIF4E	ENSG00000151247	4
EIF5A	ENSG00000132507	17
ELAC2	ENSG00000006744	17
ELMO2	ENSG00000062598	20
ELN	ENSG00000049540	7
ELOVL4	ENSG00000118402	6
ELP2	ENSG00000134759	18
ELP4	ENSG00000109911	11
EMC1	ENSG00000127463	1
EMC10	ENSG00000161671	19
EMG1	ENSG00000126749	12
EML1	ENSG00000066629	14
EMX2	ENSG00000170370	10
ENTPD1	ENSG00000138185	10
EOGT	ENSG00000163378	3
EP300	ENSG00000100393	22
EPB41L1	ENSG00000088367	20
EPG5	ENSG00000152223	18
EPHA7	ENSG00000135333	6
ERBB2	ENSG00000141736	17
ERBB4	ENSG00000178568	2
ERCC1	ENSG00000012061	19
ERCC2	ENSG00000104884	19
ERCC3	ENSG00000163161	2
ERCC4	ENSG00000175595	16
ERCC5	ENSG00000134899	13
ERCC6	ENSG00000225830	10
ERCC8	ENSG00000049167	5
ERF	ENSG00000105722	19
ERI1	ENSG00000104626	8
ERLIN2	ENSG00000147475	8
ERMARD	ENSG00000130023	6
ESCO2	ENSG00000171320	8
ESS2	ENSG00000100056	22
ETFB	ENSG00000105379	19
ETHE1	ENSG00000105755	19
EVC	ENSG00000072840	4
EVC2	ENSG00000173040	4
EXOC2	ENSG00000112685	6
EXOC6B	ENSG00000144036	2
EXOC7	ENSG00000182473	17
EXOSC2	ENSG00000130713	9
EXOSC3	ENSG00000107371	9
EXOSC8	ENSG00000120699	13
EXOSC9	ENSG00000123737	4
EXT1	ENSG00000182197	8
EXT2	ENSG00000151348	11
EXTL3	ENSG00000012232	8
EYA1	ENSG00000104313	8
EYS	ENSG00000188107	6
EZH2	ENSG00000106462	7
EZR	ENSG00000092820	6
FA2H	ENSG00000103089	16
FAAH2	ENSG00000165591	X
FAM111A	ENSG00000166801	11
FAM120C	ENSG00000184083	X
FAM126A	ENSG00000122591	7
FAM149B1	ENSG00000138286	10
FAM161A	ENSG00000170264	2
FAM183A	ENSG00000186973	1
FAM20C	ENSG00000177706	7
FAM50A	ENSG00000071859	X
FANCA	ENSG00000187741	16
FANCB	ENSG00000181544	X
FANCC	ENSG00000158169	9
FANCD2	ENSG00000144554	3
FANCE	ENSG00000112039	6
FANCF	ENSG00000183161	11
FANCG	ENSG00000221829	9
FANCI	ENSG00000140525	15
FANCL	ENSG00000115392	2
FANCM	ENSG00000187790	14
FAR1	ENSG00000197601	11
FARS2	ENSG00000145982	6
FARSB	ENSG00000116120	2
FASN	ENSG00000169710	17
FASTKD2	ENSG00000118246	2
FAT4	ENSG00000196159	4
FBN1	ENSG00000166147	15
FBP1	ENSG00000165140	9
FBRSL1	ENSG00000112787	12
FBXL3	ENSG00000005812	13
FBXL4	ENSG00000112234	6
FBXO11	ENSG00000138081	2
FBXO28	ENSG00000143756	1
FBXO31	ENSG00000103264	16
FBXW11	ENSG00000072803	5
FDFT1	ENSG00000079459	8
FDXR	ENSG00000161513	17
FGD1	ENSG00000102302	X
FGF12	ENSG00000114279	3
FGF13	ENSG00000129682	X
FGF14	ENSG00000102466	13
FGF8	ENSG00000107831	10
FGFR1	ENSG00000077782	8
FGFR2	ENSG00000066468	10
FGFR3	ENSG00000068078	4
FGFRL1	ENSG00000127418	4
FH	ENSG00000091483	1
FHIP2A	ENSG00000151553	10
FIBP	ENSG00000172500	11
FIG4	ENSG00000112367	6
FIGN	ENSG00000182263	2
FKRP	ENSG00000181027	19
FKTN	ENSG00000106692	9
FLCN	ENSG00000154803	17
FLI1	ENSG00000151702	11
FLII	ENSG00000177731	17
FLNA	ENSG00000196924	X
FLNB	ENSG00000136068	3
FLVCR1	ENSG00000162769	1
FLVCR2	ENSG00000119686	14
FMN2	ENSG00000155816	1
FMR1	ENSG00000102081	X
FOLR1	ENSG00000110195	11
FOS	ENSG00000170345	14
FOXC1	ENSG00000054598	6
FOXE1	ENSG00000178919	9
FOXF1	ENSG00000103241	16
FOXG1	ENSG00000176165	14
FOXH1	ENSG00000160973	8
FOXI1	ENSG00000168269	5
FOXP1	ENSG00000114861	3
FOXP2	ENSG00000128573	7
FOXP4	ENSG00000137166	6
FOXRED1	ENSG00000110074	11
FRA16E	NA	NA
FRAS1	ENSG00000138759	4
FREM2	ENSG00000150893	13
FRG1	ENSG00000109536	4
FRMD4A	ENSG00000151474	10
FRMPD4	ENSG00000169933	X
FRRS1L	ENSG00000260230	9
FRY	ENSG00000073910	13
FSCN2	ENSG00000186765	17
FTCD	ENSG00000160282	21
FTL	ENSG00000087086	19
FTO	ENSG00000140718	16
FTSJ1	ENSG00000068438	X
FUCA1	ENSG00000179163	1
FUT8	ENSG00000033170	14
FXR1	ENSG00000114416	3
FXR2	ENSG00000129245	17
FZD2	ENSG00000180340	17
FZR1	ENSG00000105325	19
G6PC3	ENSG00000141349	17
GABBR2	ENSG00000136928	9
GABRA1	ENSG00000022355	5
GABRA2	ENSG00000151834	4
GABRA3	ENSG00000011677	X
GABRA4	ENSG00000109158	4
GABRA5	ENSG00000186297	15
GABRB1	ENSG00000163288	4
GABRB2	ENSG00000145864	5
GABRB3	ENSG00000166206	15
GABRD	ENSG00000187730	1
GABRG2	ENSG00000113327	5
GAD1	ENSG00000128683	2
GALC	ENSG00000054983	14
GALE	ENSG00000117308	1
GALNT2	ENSG00000143641	1
GALT	ENSG00000213930	9
GAMT	ENSG00000130005	19
GAN	ENSG00000261609	16
GARNL3	ENSG00000136895	9
GAS1	ENSG00000180447	9
GATA1	ENSG00000102145	X
GATA4	ENSG00000136574	8
GATA6	ENSG00000141448	18
GATAD2B	ENSG00000143614	1
GATM	ENSG00000171766	15
GBA	ENSG00000177628	1
GBA2	ENSG00000070610	9
GBE1	ENSG00000114480	3
GCDH	ENSG00000105607	19
GCH1	ENSG00000131979	14
GCK	ENSG00000106633	7
GCLC	ENSG00000001084	6
GCSH	ENSG00000140905	16
GDF6	ENSG00000156466	8
GDI1	ENSG00000203879	X
GDNF	ENSG00000168621	5
GEMIN4	ENSG00000179409	17
GEMIN5	ENSG00000082516	5
GFAP	ENSG00000131095	17
GFER	ENSG00000127554	16
GFM1	ENSG00000168827	3
GFM2	ENSG00000164347	5
GGT1	ENSG00000100031	22
GHR	ENSG00000112964	5
GJA1	ENSG00000152661	6
GJA5	ENSG00000265107	1
GJA8	ENSG00000121634	1
GJB1	ENSG00000169562	X
GJB2	ENSG00000165474	13
GJB3	ENSG00000188910	1
GJB4	ENSG00000189433	1
GJB6	ENSG00000121742	13
GJC2	ENSG00000198835	1
GK	ENSG00000198814	X
GLB1	ENSG00000170266	3
GLDC	ENSG00000178445	9
GLI1	ENSG00000111087	12
GLI2	ENSG00000074047	2
GLI3	ENSG00000106571	7
GLIS3	ENSG00000107249	9
GLRA1	ENSG00000145888	5
GLRA2	ENSG00000101958	X
GLRB	ENSG00000109738	4
GLS	ENSG00000115419	2
GLUD1	ENSG00000148672	10
GLUL	ENSG00000135821	1
GLYCTK	ENSG00000168237	3
GM2A	ENSG00000196743	5
GMNN	ENSG00000112312	6
GMPPA	ENSG00000144591	2
GMPPB	ENSG00000173540	3
GNAI1	ENSG00000127955	7
GNAI2	ENSG00000114353	3
GNAO1	ENSG00000087258	16
GNAQ	ENSG00000156052	9
GNAS	ENSG00000087460	20
GNB1	ENSG00000078369	1
GNB2	ENSG00000172354	7
GNB5	ENSG00000069966	15
GNE	ENSG00000159921	9
GNPAT	ENSG00000116906	1
GNPTAB	ENSG00000111670	12
GNPTG	ENSG00000090581	16
GNS	ENSG00000135677	12
GON4L	ENSG00000116580	1
GORAB	ENSG00000120370	1
GOT2	ENSG00000125166	16
GP1BB	ENSG00000203618	22
GPAA1	ENSG00000197858	8
GPC3	ENSG00000147257	X
GPC4	ENSG00000076716	X
GPC6	ENSG00000183098	13
GPHN	ENSG00000171723	14
GPI	ENSG00000105220	19
GPR161	ENSG00000143147	1
GPR52	ENSG00000203737	1
GPR56	ENSG00000205336	10
GPR88	ENSG00000181656	1
GPSM2	ENSG00000121957	1
GPT2	ENSG00000166123	16
GRAMD1B	ENSG00000023171	11
GRIA1	ENSG00000155511	5
GRIA2	ENSG00000120251	4
GRIA3	ENSG00000125675	X
GRIA4	ENSG00000152578	11
GRID2	ENSG00000152208	4
GRIK2	ENSG00000164418	6
GRIK4	ENSG00000149403	11
GRIN1	ENSG00000176884	9
GRIN2A	ENSG00000183454	16
GRIN2B	ENSG00000273079	12
GRIN2D	ENSG00000105464	19
GRIP1	ENSG00000155974	12
GRM1	ENSG00000152822	6
GRM5	ENSG00000168959	11
GRM7	ENSG00000196277	3
GRN	ENSG00000030582	17
GSPT2	ENSG00000189369	X
GSS	ENSG00000100983	20
GSX2	ENSG00000180613	4
GTF2E2	ENSG00000197265	8
GTF2H5	ENSG00000272047	6
GTF2I	ENSG00000263001	7
GTF2IRD1	ENSG00000006704	7
GTF3C3	ENSG00000119041	2
GTPBP2	ENSG00000172432	6
GTPBP3	ENSG00000130299	19
GUCA1B	ENSG00000112599	6
GUCY2D	ENSG00000132518	17
GUF1	ENSG00000151806	4
GUSB	ENSG00000169919	7
GYS2	ENSG00000111713	12
H1-4	ENSG00000168298	6
H19	ENSG00000130600	11
H3-3A	ENSG00000163041	1
H3-3B	ENSG00000132475	17
H3-4	ENSG00000168148	1
H4C11	ENSG00000197238	6
H4C2	ENSG00000278705	6
H4C3	ENSG00000197061	6
H4C5	ENSG00000276966	6
H4C9	ENSG00000276180	6
HAAO	ENSG00000162882	2
HACE1	ENSG00000085382	6
HADH	ENSG00000138796	4
HADHA	ENSG00000084754	2
HADHB	ENSG00000138029	2
HARS1	ENSG00000170445	5
HAX1	ENSG00000143575	1
HBA1	ENSG00000206172	16
HBA2	ENSG00000188536	16
HCCS	ENSG00000004961	X
HCFC1	ENSG00000172534	X
HCN1	ENSG00000164588	5
HCN4	ENSG00000138622	15
HDAC3	ENSG00000171720	5
HDAC4	ENSG00000068024	2
HDAC6	ENSG00000094631	X
HDAC8	ENSG00000147099	X
HEATR5B	ENSG00000008869	2
HECW2	ENSG00000138411	2
HELLS	ENSG00000119969	10
HEPACAM	ENSG00000165478	11
HEPHL1	ENSG00000181333	11
HERC1	ENSG00000103657	15
HERC2	ENSG00000128731	15
HES7	ENSG00000179111	17
HESX1	ENSG00000163666	3
HEXA	ENSG00000213614	15
HEXB	ENSG00000049860	5
HGSNAT	ENSG00000165102	8
HHAT	ENSG00000054392	1
HIBCH	ENSG00000198130	2
HIKESHI	ENSG00000149196	11
HINT1	ENSG00000169567	5
HIRA	ENSG00000100084	22
HIST1H1E	ENSG00000168298	6
HIVEP2	ENSG00000010818	6
HK1	ENSG00000156515	10
HLCS	ENSG00000159267	21
HMGA2	ENSG00000149948	12
HMGB1	ENSG00000189403	13
HMGB3	ENSG00000029993	X
HMGCL	ENSG00000117305	1
HNF1B	ENSG00000275410	17
HNF4A	ENSG00000101076	20
HNMT	ENSG00000150540	2
HNRNPA1	ENSG00000135486	12
HNRNPA2B1	ENSG00000122566	7
HNRNPH1	ENSG00000169045	5
HNRNPH2	ENSG00000126945	X
HNRNPK	ENSG00000165119	9
HNRNPR	ENSG00000125944	1
HNRNPU	ENSG00000153187	1
HOXA1	ENSG00000105991	7
HPD	ENSG00000158104	12
HPDL	ENSG00000186603	1
HPRT1	ENSG00000165704	X
HRAS	ENSG00000174775	11
HS2ST1	ENSG00000153936	1
HS6ST2	ENSG00000171004	X
HSD17B10	ENSG00000072506	X
HSD17B4	ENSG00000133835	5
HSPD1	ENSG00000144381	2
HSPG2	ENSG00000142798	1
HTR1A	ENSG00000178394	5
HTR7	ENSG00000148680	10
HTRA2	ENSG00000115317	2
HTT	ENSG00000197386	4
HUWE1	ENSG00000086758	X
HYLS1	ENSG00000198331	11
IARS	ENSG00000196305	9
IARS1	ENSG00000196305	9
IBA57	ENSG00000181873	1
ICE2	ENSG00000128915	15
IDH2	ENSG00000182054	15
IDH3A	ENSG00000166411	15
IDH3B	ENSG00000101365	20
IDS	ENSG00000010404	X
IDUA	ENSG00000127415	4
IER3IP1	ENSG00000134049	18
IFIH1	ENSG00000115267	2
IFNG	ENSG00000111537	12
IFT140	ENSG00000187535	16
IFT172	ENSG00000138002	2
IFT27	ENSG00000100360	22
IFT74	ENSG00000096872	9
IFT88	ENSG00000032742	13
IGBP1	ENSG00000089289	X
IGF1	ENSG00000017427	12
IGF1R	ENSG00000140443	15
IGF2	ENSG00000167244	11
IKBKG	ENSG00000269335	X
IL1RAPL1	ENSG00000169306	X
IL1RAPL2	ENSG00000189108	X
IMMP2L	ENSG00000184903	7
IMPA1	ENSG00000133731	8
IMPDH1	ENSG00000106348	7
IMPG2	ENSG00000081148	3
INPP4A	ENSG00000040933	2
INPP5E	ENSG00000148384	9
INPP5K	ENSG00000132376	17
INS	ENSG00000254647	11
INSR	ENSG00000171105	19
INTS1	ENSG00000164880	7
INVS	ENSG00000119509	9
IPW	NA	NA
IQCB1	ENSG00000173226	3
IQSEC1	ENSG00000144711	3
IQSEC2	ENSG00000124313	X
IRF2BPL	ENSG00000119669	14
IRF6	ENSG00000117595	1
IRX5	ENSG00000176842	16
ISCA1	ENSG00000135070	9
ISPD	ENSG00000214960	7
ITCH	ENSG00000078747	20
ITGA7	ENSG00000135424	12
ITGB3	ENSG00000259207	17
ITGB6	ENSG00000115221	2
ITIH6	ENSG00000102313	X
ITPA	ENSG00000125877	20
ITPR1	ENSG00000150995	3
ITSN1	ENSG00000205726	21
IVD	ENSG00000128928	15
IYD	ENSG00000009765	6
JAG1	ENSG00000101384	20
JAM3	ENSG00000166086	11
JARID2	ENSG00000008083	6
JMJD1C	ENSG00000171988	10
KALRN	ENSG00000160145	3
KANK1	ENSG00000107104	9
KANSL1	ENSG00000120071	17
KARS1	ENSG00000065427	16
KAT5	ENSG00000172977	11
KAT6A	ENSG00000083168	8
KAT6B	ENSG00000156650	10
KAT8	ENSG00000103510	16
KATNAL2	ENSG00000167216	18
KATNB1	ENSG00000140854	16
KCNA1	ENSG00000111262	12
KCNA2	ENSG00000177301	1
KCNA4	ENSG00000182255	11
KCNAB2	ENSG00000069424	1
KCNB1	ENSG00000158445	20
KCNC1	ENSG00000129159	11
KCNC2	ENSG00000166006	12
KCNC3	ENSG00000131398	19
KCND3	ENSG00000171385	1
KCNE5	ENSG00000176076	X
KCNH1	ENSG00000143473	1
KCNJ1	ENSG00000151704	11
KCNJ10	ENSG00000177807	1
KCNJ11	ENSG00000187486	11
KCNJ13	ENSG00000115474	2
KCNJ16	ENSG00000153822	17
KCNJ6	ENSG00000157542	21
KCNJ8	ENSG00000121361	12
KCNK3	ENSG00000171303	2
KCNK4	ENSG00000182450	11
KCNK9	ENSG00000169427	8
KCNMA1	ENSG00000156113	10
KCNN2	ENSG00000080709	5
KCNN3	ENSG00000143603	1
KCNQ1OT1	ENSG00000269821	11
KCNQ2	ENSG00000075043	20
KCNQ3	ENSG00000184156	8
KCNQ5	ENSG00000185760	6
KCNT1	ENSG00000107147	9
KCNT2	ENSG00000162687	1
KCTD3	ENSG00000136636	1
KCTD7	ENSG00000243335	7
KDM1A	ENSG00000004487	1
KDM2B	ENSG00000089094	12
KDM3B	ENSG00000120733	5
KDM4B	ENSG00000127663	19
KDM5A	ENSG00000073614	12
KDM5B	ENSG00000117139	1
KDM5C	ENSG00000126012	X
KDM6A	ENSG00000147050	X
KDM6B	ENSG00000132510	17
KDSR	ENSG00000119537	18
KIAA0586	ENSG00000100578	14
KIAA0753	ENSG00000198920	17
KIAA1109	ENSG00000138688	4
KIAA1279	ENSG00000198954	10
KIAA2022	ENSG00000050030	X
KIDINS220	ENSG00000134313	2
KIF11	ENSG00000138160	10
KIF14	ENSG00000118193	1
KIF15	ENSG00000163808	3
KIF16B	ENSG00000089177	20
KIF1A	ENSG00000130294	2
KIF1B	ENSG00000054523	1
KIF1C	ENSG00000129250	17
KIF21B	ENSG00000116852	1
KIF2A	ENSG00000068796	5
KIF4A	ENSG00000090889	X
KIF5A	ENSG00000155980	12
KIF5C	ENSG00000168280	2
KIF7	ENSG00000166813	15
KIFBP	ENSG00000198954	10
KIRREL3	ENSG00000149571	11
KIT	ENSG00000157404	4
KIZ	ENSG00000088970	20
KLF7	ENSG00000118263	2
KLF8	ENSG00000102349	X
KLHL15	ENSG00000174010	X
KLHL7	ENSG00000122550	7
KLLN	ENSG00000227268	10
KMT2A	ENSG00000118058	11
KMT2B	ENSG00000272333	19
KMT2C	ENSG00000055609	7
KMT2D	ENSG00000167548	12
KMT2E	ENSG00000005483	7
KMT5B	ENSG00000110066	11
KNL1	ENSG00000137812	15
KPNA7	ENSG00000185467	7
KPTN	ENSG00000118162	19
KRAS	ENSG00000133703	12
KRBOX4	ENSG00000147121	X
KRT81	ENSG00000205426	12
KRT83	ENSG00000170523	12
KRT86	ENSG00000170442	12
KY	ENSG00000174611	3
KYNU	ENSG00000115919	2
L1CAM	ENSG00000198910	X
L2HGDH	ENSG00000087299	14
LAGE3	ENSG00000196976	X
LAMA1	ENSG00000101680	18
LAMA2	ENSG00000196569	6
LAMB1	ENSG00000091136	7
LAMB2	ENSG00000172037	3
LAMC3	ENSG00000050555	9
LAMP2	ENSG00000005893	X
LARGE	ENSG00000133424	22
LARGE1	ENSG00000133424	22
LARP4B	ENSG00000107929	10
LARP7	ENSG00000174720	4
LARS1	ENSG00000133706	5
LAS1L	ENSG00000001497	X
LBR	ENSG00000143815	1
LCA5	ENSG00000135338	6
LDHD	ENSG00000166816	16
LEMD3	ENSG00000174106	12
LEPR	ENSG00000116678	1
LETM1	ENSG00000168924	4
LFNG	ENSG00000106003	7
LGI3	ENSG00000168481	8
LGI4	ENSG00000153902	19
LHX1	ENSG00000273706	17
LHX3	ENSG00000107187	9
LHX4	ENSG00000121454	1
LIAS	ENSG00000121897	4
LIG4	ENSG00000174405	13
LIMK1	ENSG00000106683	7
LINGO1	ENSG00000169783	15
LINS	ENSG00000140471	15
LINS1	ENSG00000140471	15
LIPA	ENSG00000107798	10
LIPT1	ENSG00000144182	2
LIPT2	ENSG00000175536	11
LMAN2L	ENSG00000114988	2
LMBR1	ENSG00000105983	7
LMBRD1	ENSG00000168216	6
LMBRD2	ENSG00000164187	5
LMNA	ENSG00000160789	1
LMNB1	ENSG00000113368	5
LMNB2	ENSG00000176619	19
LNPK	ENSG00000144320	2
LONP1	ENSG00000196365	19
LRAT	ENSG00000121207	4
LRP2	ENSG00000081479	2
LRP5	ENSG00000162337	11
LRPPRC	ENSG00000138095	2
LRRC32	ENSG00000137507	11
LRRC7	ENSG00000033122	1
LSS	ENSG00000160285	21
LTBP1	ENSG00000049323	2
LTBP2	ENSG00000119681	14
LTBP4	ENSG00000090006	19
LTC4S	ENSG00000213316	5
LYRM7	ENSG00000186687	5
LYST	ENSG00000143669	1
LZTFL1	ENSG00000163818	3
LZTR1	ENSG00000099949	22
MAB21L1	ENSG00000180660	13
MAB21L2	ENSG00000181541	4
MACF1	ENSG00000127603	1
MACROD2	ENSG00000172264	20
MAD2L2	ENSG00000116670	1
MADD	ENSG00000110514	11
MAF	ENSG00000178573	16
MAFB	ENSG00000204103	20
MAG	ENSG00000105695	19
MAGED2	ENSG00000102316	X
MAGEL2	ENSG00000254585	15
MAGT1	ENSG00000102158	X
MAK	ENSG00000111837	6
MAN1B1	ENSG00000177239	9
MAN2B1	ENSG00000104774	19
MAN2C1	ENSG00000140400	15
MANBA	ENSG00000109323	4
MAOA	ENSG00000189221	X
MAP1B	ENSG00000131711	5
MAP2K1	ENSG00000169032	15
MAP2K2	ENSG00000126934	19
MAP3K7	ENSG00000135341	6
MAPK1	ENSG00000100030	22
MAPK10	ENSG00000109339	4
MAPK3	ENSG00000102882	16
MAPK8IP3	ENSG00000138834	16
MAPRE2	ENSG00000166974	18
MARS1	ENSG00000166986	12
MARS2	ENSG00000247626	2
MASP1	ENSG00000127241	3
MAST1	ENSG00000105613	19
MAT1A	ENSG00000151224	10
MBD5	ENSG00000204406	2
MBOAT7	ENSG00000125505	19
MBTPS2	ENSG00000012174	X
MC2R	ENSG00000185231	18
MCCC1	ENSG00000078070	3
MCCC2	ENSG00000131844	5
MCM3AP	ENSG00000160294	21
MCM4	ENSG00000104738	8
MCOLN1	ENSG00000090674	19
MCPH1	ENSG00000147316	8
MCTP2	ENSG00000140563	15
MDH2	ENSG00000146701	7
MECP2	ENSG00000169057	X
MED12	ENSG00000184634	X
MED12L	ENSG00000144893	3
MED13	ENSG00000108510	17
MED13L	ENSG00000123066	12
MED17	ENSG00000042429	11
MED23	ENSG00000112282	6
MED25	ENSG00000104973	19
MED27	ENSG00000160563	9
MEF2C	ENSG00000081189	5
MEGF8	ENSG00000105429	19
MEIS2	ENSG00000134138	15
MERTK	ENSG00000153208	2
MESP2	ENSG00000188095	15
METAP1	ENSG00000164024	4
METTL23	ENSG00000181038	17
METTL5	ENSG00000138382	2
MFF	ENSG00000168958	2
MFN2	ENSG00000116688	1
MFSD2A	ENSG00000168389	1
MFSD8	ENSG00000164073	4
MGAT2	ENSG00000168282	14
MGME1	ENSG00000125871	20
MGP	ENSG00000111341	12
MIA3	ENSG00000154305	1
MICOS13	ENSG00000174917	19
MICU1	ENSG00000107745	10
MID1	ENSG00000101871	X
MID2	ENSG00000080561	X
MINPP1	ENSG00000107789	10
MIPEP	ENSG00000027001	13
MIR137	ENSG00000284202	1
MIR17HG	ENSG00000215417	13
MITF	ENSG00000187098	3
MKKS	ENSG00000125863	20
MKRN3	ENSG00000179455	15
MKRN3-AS1	NA	NA
MKS1	ENSG00000011143	17
MLC1	ENSG00000100427	22
MLLT1	ENSG00000130382	19
MLXIPL	ENSG00000009950	7
MLYCD	ENSG00000103150	16
MMAA	ENSG00000151611	4
MMAB	ENSG00000139428	12
MMACHC	ENSG00000132763	1
MMADHC	ENSG00000168288	2
MMUT	ENSG00000146085	6
MN1	ENSG00000169184	22
MNX1	ENSG00000130675	7
MOCS1	ENSG00000124615	6
MOCS2	ENSG00000164172	5
MOGS	ENSG00000115275	2
MORC2	ENSG00000133422	22
MPC1	ENSG00000060762	6
MPDU1	ENSG00000129255	17
MPDZ	ENSG00000107186	9
MPI	ENSG00000178802	15
MPLKIP	ENSG00000168303	7
MPV17	ENSG00000115204	2
MPZ	ENSG00000158887	1
MRAP	ENSG00000170262	21
MRE11	ENSG00000020922	11
MRPL3	ENSG00000114686	3
MRPS2	ENSG00000122140	9
MRPS22	ENSG00000175110	3
MRPS34	ENSG00000074071	16
MRT4	NA	NA
MRX73	NA	NA
MRX81	NA	NA
MRX82	NA	NA
MSL2	ENSG00000174579	3
MSL3	ENSG00000005302	X
MSMO1	ENSG00000052802	4
MSTO1	ENSG00000125459	1
MTF1	ENSG00000188786	1
MTFMT	ENSG00000103707	15
MTHFD1	ENSG00000100714	14
MTHFR	ENSG00000177000	1
MTHFS	ENSG00000136371	15
MTO1	ENSG00000135297	6
MTOR	ENSG00000198793	1
MTR	ENSG00000116984	1
MTRFR	ENSG00000130921	12
MTRR	ENSG00000124275	5
MTSS2	ENSG00000132613	16
MUT	ENSG00000146085	6
MVK	ENSG00000110921	12
MYCN	ENSG00000134323	2
MYH3	ENSG00000109063	17
MYH7	ENSG00000092054	14
MYH9	ENSG00000100345	22
MYO5A	ENSG00000197535	15
MYO5B	ENSG00000167306	18
MYO7A	ENSG00000137474	11
MYO9A	ENSG00000066933	15
MYT1	ENSG00000196132	20
MYT1L	ENSG00000186487	2
NAA10	ENSG00000102030	X
NAA15	ENSG00000164134	4
NAA20	ENSG00000173418	20
NACC1	ENSG00000160877	19
NADK2	ENSG00000152620	5
NAGA	ENSG00000198951	22
NAGLU	ENSG00000108784	17
NALCN	ENSG00000102452	13
NANS	ENSG00000095380	9
NARS1	ENSG00000134440	18
NARS2	ENSG00000137513	11
NAT8L	ENSG00000185818	4
NBAS	ENSG00000151779	2
NBEA	ENSG00000172915	13
NBN	ENSG00000104320	8
NCAPD2	ENSG00000010292	12
NCAPD3	ENSG00000151503	11
NCAPG2	ENSG00000146918	7
NCAPH	ENSG00000121152	2
NCDN	ENSG00000020129	1
NCKAP1	ENSG00000061676	2
NCOR1	ENSG00000141027	17
ND3	ENSG00000198840	MT
ND5	ENSG00000198786	MT
ND6	ENSG00000198695	MT
NDE1	ENSG00000072864	16
NDN	ENSG00000182636	15
NDP	ENSG00000124479	X
NDST1	ENSG00000070614	5
NDUFA1	ENSG00000125356	X
NDUFA10	ENSG00000130414	2
NDUFA11	ENSG00000174886	19
NDUFA12	ENSG00000184752	12
NDUFA13	ENSG00000186010	19
NDUFA2	ENSG00000131495	5
NDUFA4	ENSG00000189043	7
NDUFA9	ENSG00000139180	12
NDUFAF1	ENSG00000137806	15
NDUFAF2	ENSG00000164182	5
NDUFAF3	ENSG00000178057	3
NDUFAF4	ENSG00000123545	6
NDUFAF5	ENSG00000101247	20
NDUFAF6	ENSG00000156170	8
NDUFB11	ENSG00000147123	X
NDUFB3	ENSG00000119013	2
NDUFB8	ENSG00000166136	10
NDUFB9	ENSG00000147684	8
NDUFS1	ENSG00000023228	2
NDUFS2	ENSG00000158864	1
NDUFS3	ENSG00000213619	11
NDUFS4	ENSG00000164258	5
NDUFS6	ENSG00000145494	5
NDUFS7	ENSG00000115286	19
NDUFS8	ENSG00000110717	11
NDUFV1	ENSG00000167792	11
NDUFV2	ENSG00000178127	18
NEB	ENSG00000183091	2
NECAP1	ENSG00000089818	12
NECTIN1	ENSG00000110400	11
NEDD4L	ENSG00000049759	18
NEFL	ENSG00000277586	8
NEGR1	ENSG00000172260	1
NEK2	ENSG00000117650	1
NELFA	ENSG00000185049	4
NEMF	ENSG00000165525	14
NEU1	ENSG00000204386	6
NEUROD2	ENSG00000171532	17
NEXMIF	ENSG00000050030	X
NF1	ENSG00000196712	17
NFE2L2	ENSG00000116044	2
NFIA	ENSG00000162599	1
NFIB	ENSG00000147862	9
NFIX	ENSG00000008441	19
NFKB2	ENSG00000077150	10
NFU1	ENSG00000169599	2
NGF	ENSG00000134259	1
NGFR	ENSG00000064300	17
NGLY1	ENSG00000151092	3
NHP2	ENSG00000145912	5
NHS	ENSG00000188158	X
NIN	ENSG00000100503	14
NIPA1	ENSG00000170113	15
NIPA2	ENSG00000140157	15
NIPBL	ENSG00000164190	5
NKAP	ENSG00000101882	X
NKX2-1	ENSG00000136352	14
NKX2-5	ENSG00000183072	5
NKX6-2	ENSG00000148826	10
NLGN1	ENSG00000169760	3
NLGN2	ENSG00000169992	17
NLGN3	ENSG00000196338	X
NLGN4	ENSG00000146938	X
NLGN4X	ENSG00000146938	X
NLGN4Y	ENSG00000165246	Y
NLRP3	ENSG00000162711	1
NMNAT1	ENSG00000173614	1
NODAL	ENSG00000156574	10
NOG	ENSG00000183691	17
NONO	ENSG00000147140	X
NOP10	ENSG00000182117	15
NOS1	ENSG00000089250	12
NOTCH1	ENSG00000148400	9
NOTCH3	ENSG00000074181	19
NOVA2	ENSG00000104967	19
NPAP1	ENSG00000185823	15
NPAS3	ENSG00000151322	14
NPAS4	ENSG00000174576	11
NPC1	ENSG00000141458	18
NPC2	ENSG00000119655	14
NPHP1	ENSG00000144061	2
NPHP3	ENSG00000113971	3
NPHP4	ENSG00000131697	1
NPR2	ENSG00000159899	9
NPRL3	ENSG00000103148	16
NR1I3	ENSG00000143257	1
NR2E3	ENSG00000278570	15
NR2F1	ENSG00000175745	5
NR3C2	ENSG00000151623	4
NR4A2	ENSG00000153234	2
NRAS	ENSG00000213281	1
NRCAM	ENSG00000091129	7
NRL	ENSG00000129535	14
NRTN	ENSG00000171119	19
NRXN1	ENSG00000179915	2
NRXN2	ENSG00000110076	11
NRXN3	ENSG00000021645	14
NSD1	ENSG00000165671	5
NSD2	ENSG00000109685	4
NSDHL	ENSG00000147383	X
NSF	ENSG00000073969	17
NSMCE3	ENSG00000185115	15
NSUN2	ENSG00000037474	5
NT5C2	ENSG00000076685	10
NTF4	ENSG00000225950	19
NTN1	ENSG00000065320	17
NTNG1	ENSG00000162631	1
NTNG2	ENSG00000196358	9
NTRK1	ENSG00000198400	1
NTRK2	ENSG00000148053	9
NUBPL	ENSG00000151413	14
NUDT2	ENSG00000164978	9
NUFIP2	ENSG00000108256	17
NUP107	ENSG00000111581	12
NUP205	ENSG00000155561	7
NUP214	ENSG00000126883	9
NUP62	ENSG00000213024	19
NUP85	ENSG00000125450	17
NUS1	ENSG00000153989	6
NXF5	ENSG00000126952	X
NXN	ENSG00000167693	17
OCA2	ENSG00000104044	15
OCLN	ENSG00000197822	5
OCRL	ENSG00000122126	X
ODC1	ENSG00000115758	2
OFD1	ENSG00000046651	X
OGDH	ENSG00000105953	7
OGT	ENSG00000147162	X
OPA1	ENSG00000198836	3
OPA3	ENSG00000125741	19
OPHN1	ENSG00000079482	X
ORC1	ENSG00000085840	1
ORC4	ENSG00000115947	2
ORC6	ENSG00000091651	16
OSGEP	ENSG00000092094	14
OTC	ENSG00000036473	X
OTUD5	ENSG00000068308	X
OTUD6B	ENSG00000155100	8
OTUD7A	ENSG00000169918	15
OTX2	ENSG00000165588	14
OXR1	ENSG00000164830	8
OXTR	ENSG00000180914	3
P3H1	ENSG00000117385	1
P4HB	ENSG00000185624	17
P4HTM	ENSG00000178467	3
PACS1	ENSG00000175115	11
PACS2	ENSG00000179364	14
PAFAH1B1	ENSG00000007168	17
PAFAH1B3	ENSG00000079462	19
PAH	ENSG00000171759	12
PAK1	ENSG00000149269	11
PAK3	ENSG00000077264	X
PALB2	ENSG00000083093	16
PALS1	ENSG00000072415	14
PAM16	ENSG00000217930	16
PANK2	ENSG00000125779	20
PAPSS2	ENSG00000198682	10
PARN	ENSG00000140694	16
PARP1	ENSG00000143799	1
PARP6	ENSG00000137817	15
PARS2	ENSG00000162396	1
PAX1	ENSG00000125813	20
PAX2	ENSG00000075891	10
PAX3	ENSG00000135903	2
PAX6	ENSG00000007372	11
PAX7	ENSG00000009709	1
PAX8	ENSG00000125618	2
PBX1	ENSG00000185630	1
PC	ENSG00000173599	11
PCCA	ENSG00000175198	13
PCCB	ENSG00000114054	3
PCDH12	ENSG00000113555	5
PCDH15	ENSG00000150275	10
PCDH19	ENSG00000165194	X
PCDHGC4	ENSG00000242419	5
PCGF2	ENSG00000277258	17
PCK1	ENSG00000124253	20
PCLO	ENSG00000186472	7
PCNA	ENSG00000132646	20
PCNT	ENSG00000160299	21
PCYT1A	ENSG00000161217	3
PCYT2	ENSG00000185813	17
PDCD6IP	ENSG00000170248	3
PDE10A	ENSG00000112541	6
PDE2A	ENSG00000186642	11
PDE4D	ENSG00000113448	5
PDE6A	ENSG00000132915	5
PDE6B	ENSG00000133256	4
PDE6D	ENSG00000156973	2
PDE6G	ENSG00000185527	17
PDGFRB	ENSG00000113721	5
PDHA1	ENSG00000131828	X
PDHB	ENSG00000168291	3
PDHX	ENSG00000110435	11
PDIA3	ENSG00000167004	15
PDP1	ENSG00000164951	8
PDSS1	ENSG00000148459	10
PDSS2	ENSG00000164494	6
PDX1	ENSG00000139515	13
PECR	ENSG00000115425	2
PEPD	ENSG00000124299	19
PET100	ENSG00000229833	19
PEX1	ENSG00000127980	7
PEX10	ENSG00000157911	1
PEX11B	ENSG00000131779	1
PEX12	ENSG00000108733	17
PEX13	ENSG00000162928	2
PEX14	ENSG00000142655	1
PEX16	ENSG00000121680	11
PEX19	ENSG00000162735	1
PEX2	ENSG00000164751	8
PEX26	ENSG00000215193	22
PEX3	ENSG00000034693	6
PEX5	ENSG00000139197	12
PEX6	ENSG00000124587	6
PEX7	ENSG00000112357	6
PGAP1	ENSG00000197121	2
PGAP2	ENSG00000148985	11
PGAP3	ENSG00000161395	17
PGK1	ENSG00000102144	X
PGM1	ENSG00000079739	1
PGM3	ENSG00000013375	6
PHACTR1	ENSG00000112137	6
PHC1	ENSG00000111752	12
PHF21A	ENSG00000135365	11
PHF3	ENSG00000118482	6
PHF6	ENSG00000156531	X
PHF8	ENSG00000172943	X
PHGDH	ENSG00000092621	1
PHIP	ENSG00000146247	6
PHKA2	ENSG00000044446	X
PHKG2	ENSG00000156873	16
PHLPP1	ENSG00000081913	18
PHOX2B	ENSG00000109132	4
PHYH	ENSG00000107537	10
PI4KA	ENSG00000241973	22
PIBF1	ENSG00000083535	13
PIDD1	ENSG00000177595	11
PIEZO1	ENSG00000103335	16
PIEZO2	ENSG00000154864	18
PIGA	ENSG00000165195	X
PIGB	ENSG00000069943	15
PIGC	ENSG00000135845	1
PIGF	ENSG00000151665	2
PIGG	ENSG00000174227	4
PIGH	ENSG00000100564	14
PIGK	ENSG00000142892	1
PIGL	ENSG00000108474	17
PIGN	ENSG00000197563	18
PIGO	ENSG00000165282	9
PIGP	ENSG00000185808	21
PIGQ	ENSG00000007541	16
PIGS	ENSG00000087111	17
PIGT	ENSG00000124155	20
PIGU	ENSG00000101464	20
PIGV	ENSG00000060642	1
PIGW	ENSG00000277161	17
PIGY	ENSG00000255072	4
PIK3C2A	ENSG00000011405	11
PIK3CA	ENSG00000121879	3
PIK3CD	ENSG00000171608	1
PIK3R2	ENSG00000105647	19
PISD	ENSG00000241878	22
PITRM1	ENSG00000107959	10
PITX2	ENSG00000164093	4
PITX3	ENSG00000107859	10
PJA1	ENSG00000181191	X
PLA2G6	ENSG00000184381	22
PLAA	ENSG00000137055	9
PLAG1	ENSG00000181690	8
PLCB1	ENSG00000182621	20
PLEKHG2	ENSG00000090924	19
PLK4	ENSG00000142731	4
PLOD3	ENSG00000106397	7
PLP1	ENSG00000123560	X
PLPBP	ENSG00000147471	8
PLXNA1	ENSG00000114554	3
PLXNA2	ENSG00000076356	1
PMM2	ENSG00000140650	16
PMP22	ENSG00000109099	17
PMPCA	ENSG00000165688	9
PMPCB	ENSG00000105819	7
PNKP	ENSG00000039650	19
PNP	ENSG00000198805	14
PNPLA6	ENSG00000032444	19
PNPO	ENSG00000108439	17
PNPT1	ENSG00000138035	2
POC1A	ENSG00000164087	3
PODXL	ENSG00000128567	7
POGZ	ENSG00000143442	1
POLA1	ENSG00000101868	X
POLD1	ENSG00000062822	19
POLG	ENSG00000140521	15
POLR1C	ENSG00000171453	6
POLR1D	ENSG00000186184	13
POLR2A	ENSG00000181222	17
POLR3A	ENSG00000148606	10
POLR3B	ENSG00000013503	12
POLRMT	ENSG00000099821	19
POMGNT1	ENSG00000085998	1
POMGNT2	ENSG00000144647	3
POMK	ENSG00000185900	8
POMT1	ENSG00000130714	9
POMT2	ENSG00000009830	14
POR	ENSG00000127948	7
PORCN	ENSG00000102312	X
POU1F1	ENSG00000064835	3
POU3F2	ENSG00000184486	6
POU3F3	ENSG00000198914	2
POU3F4	ENSG00000196767	X
PPARG	ENSG00000132170	3
PPFIBP1	ENSG00000110841	12
PPM1B	ENSG00000138032	2
PPM1D	ENSG00000170836	17
PPOX	ENSG00000143224	1
PPP1CB	ENSG00000213639	2
PPP1R12A	ENSG00000058272	12
PPP1R15B	ENSG00000158615	1
PPP1R21	ENSG00000162869	2
PPP2CA	ENSG00000113575	5
PPP2R1A	ENSG00000105568	19
PPP2R5B	ENSG00000068971	11
PPP2R5C	ENSG00000078304	14
PPP2R5D	ENSG00000112640	6
PPP3CA	ENSG00000138814	4
PPT1	ENSG00000131238	1
PQBP1	ENSG00000102103	X
PRCD	ENSG00000214140	17
PRDM13	ENSG00000112238	6
PRDM16	ENSG00000142611	1
PRDX1	ENSG00000117450	1
PREPL	ENSG00000138078	2
PRF1	ENSG00000180644	10
PRICKLE1	ENSG00000139174	12
PRICKLE2	ENSG00000163637	3
PRKACB	ENSG00000142875	1
PRKAR1A	ENSG00000108946	17
PRKAR1B	ENSG00000188191	7
PRKCG	ENSG00000126583	19
PRKD1	ENSG00000184304	14
PRKN	ENSG00000185345	6
PRKRA	ENSG00000180228	2
PRL	ENSG00000172179	6
PRMT7	ENSG00000132600	16
PRMT9	ENSG00000164169	4
PROC	ENSG00000115718	2
PRODH	ENSG00000100033	22
PROKR2	ENSG00000101292	20
PROM1	ENSG00000007062	4
PROP1	ENSG00000175325	5
PRORP	ENSG00000100890	14
PRPF3	ENSG00000117360	1
PRPF31	ENSG00000105618	19
PRPF4	ENSG00000136875	9
PRPF6	ENSG00000101161	20
PRPF8	ENSG00000174231	17
PRPH2	ENSG00000112619	6
PRPS1	ENSG00000147224	X
PRR12	ENSG00000126464	19
PRRT2	ENSG00000167371	16
PRSS12	ENSG00000164099	4
PRUNE1	ENSG00000143363	1
PSAP	ENSG00000197746	10
PSAT1	ENSG00000135069	9
PSEN1	ENSG00000080815	14
PSEN2	ENSG00000143801	1
PSMB1	ENSG00000008018	6
PSMB8	ENSG00000204264	6
PSMD12	ENSG00000197170	17
PSPH	ENSG00000146733	7
PTCH1	ENSG00000185920	9
PTCH2	ENSG00000117425	1
PTCHD1	ENSG00000165186	X
PTDSS1	ENSG00000156471	8
PTEN	ENSG00000171862	10
PTF1A	ENSG00000168267	10
PTH2R	ENSG00000144407	2
PTPN11	ENSG00000179295	12
PTPN23	ENSG00000076201	3
PTPN4	ENSG00000088179	2
PTPRD	ENSG00000153707	9
PTPRT	ENSG00000196090	20
PTRH2	ENSG00000141378	17
PTRHD1	ENSG00000184924	2
PTS	ENSG00000150787	11
PUF60	ENSG00000179950	8
PUM1	ENSG00000134644	1
PURA	ENSG00000185129	5
PUS1	ENSG00000177192	12
PUS3	ENSG00000110060	11
PUS7	ENSG00000091127	7
PWAR1	ENSG00000279050	15
PWRN1	ENSG00000259905	15
PYCR1	ENSG00000183010	17
PYCR2	ENSG00000143811	1
QARS1	ENSG00000172053	3
QDPR	ENSG00000151552	4
QKI	ENSG00000112531	6
QRICH1	ENSG00000198218	3
RAB11A	ENSG00000103769	15
RAB11B	ENSG00000185236	19
RAB18	ENSG00000099246	10
RAB23	ENSG00000112210	6
RAB27A	ENSG00000069974	15
RAB39B	ENSG00000155961	X
RAB3GAP1	ENSG00000115839	2
RAB3GAP2	ENSG00000118873	1
RAB40AL	ENSG00000102128	X
RAB5IF	ENSG00000101084	20
RABL6	ENSG00000196642	9
RAC1	ENSG00000136238	7
RAC3	ENSG00000169750	17
RAD21	ENSG00000164754	8
RAD50	ENSG00000113522	5
RAD51	ENSG00000051180	15
RAD51C	ENSG00000108384	17
RAF1	ENSG00000132155	3
RAI1	ENSG00000108557	17
RALA	ENSG00000006451	7
RALGAPA1	ENSG00000174373	14
RALGDS	ENSG00000160271	9
RANBP2	ENSG00000153201	2
RARB	ENSG00000077092	3
RARS1	ENSG00000113643	5
RARS2	ENSG00000146282	6
RASA1	ENSG00000145715	5
RB1	ENSG00000139687	13
RBBP8	ENSG00000101773	18
RBFOX1	ENSG00000078328	16
RBL2	ENSG00000103479	16
RBM10	ENSG00000182872	X
RBM28	ENSG00000106344	7
RBM8A	ENSG00000265241	1
RBMX	ENSG00000147274	X
RBP3	ENSG00000265203	10
RBPJ	ENSG00000168214	4
RCAN1	ENSG00000159200	21
RCBTB1	ENSG00000136144	13
RD3	ENSG00000198570	1
RDH11	ENSG00000072042	14
RDH12	ENSG00000139988	14
RECQL4	ENSG00000160957	8
REEP6	ENSG00000115255	19
RELN	ENSG00000189056	7
RERE	ENSG00000142599	1
RET	ENSG00000165731	10
RFC2	ENSG00000049541	7
RFT1	ENSG00000163933	3
RFWD3	ENSG00000168411	16
RFX3	ENSG00000080298	9
RFX4	ENSG00000111783	12
RFX7	ENSG00000181827	15
RGMA	ENSG00000182175	15
RGR	ENSG00000148604	10
RGS7	ENSG00000182901	1
RHO	ENSG00000163914	3
RHOBTB2	ENSG00000008853	8
RIC1	ENSG00000107036	9
RIPK4	ENSG00000183421	21
RIPPLY2	ENSG00000203877	6
RIT1	ENSG00000143622	1
RLBP1	ENSG00000140522	15
RLIM	ENSG00000131263	X
RMND1	ENSG00000155906	6
RMRP	ENSG00000277027	9
RNASEH2A	ENSG00000104889	19
RNASEH2B	ENSG00000136104	13
RNASEH2C	ENSG00000172922	11
RNASET2	ENSG00000026297	6
RNF113A	ENSG00000125352	X
RNF125	ENSG00000101695	18
RNF13	ENSG00000082996	3
RNF135	ENSG00000181481	17
RNF168	ENSG00000163961	3
RNF2	ENSG00000121481	1
RNF213	ENSG00000173821	17
RNF220	ENSG00000187147	1
RNU4ATAC	ENSG00000264229	2
ROBO1	ENSG00000169855	3
ROGDI	ENSG00000067836	16
ROM1	ENSG00000149489	11
ROR2	ENSG00000169071	9
RORA	ENSG00000069667	15
RORB	ENSG00000198963	9
RP1	ENSG00000104237	8
RP2	ENSG00000102218	X
RP9	ENSG00000164610	7
RPE65	ENSG00000116745	1
RPGR	ENSG00000156313	X
RPGRIP1	ENSG00000092200	14
RPGRIP1L	ENSG00000103494	16
RPIA	ENSG00000153574	2
RPL10	ENSG00000147403	X
RPL35A	ENSG00000182899	3
RPS19	ENSG00000105372	19
RPS23	ENSG00000186468	5
RPS28	ENSG00000233927	19
RPS6KA3	ENSG00000177189	X
RREB1	ENSG00000124782	6
RRM2B	ENSG00000048392	8
RSPRY1	ENSG00000159579	16
RSRC1	ENSG00000174891	3
RTEL1	ENSG00000258366	20
RTL1	ENSG00000254656	14
RTN4IP1	ENSG00000130347	6
RTTN	ENSG00000176225	18
RUBCN	ENSG00000145016	3
RUSC2	ENSG00000198853	9
RXYLT1	ENSG00000118600	12
RYR1	ENSG00000196218	19
RYR2	ENSG00000198626	1
SACS	ENSG00000151835	13
SAG	ENSG00000130561	2
SALL1	ENSG00000103449	16
SALL4	ENSG00000101115	20
SAMD12	ENSG00000177570	8
SAMD9	ENSG00000205413	7
SAMHD1	ENSG00000101347	20
SAR1B	ENSG00000152700	5
SARS1	ENSG00000031698	1
SARS2	ENSG00000104835	19
SASS6	ENSG00000156876	1
SATB1	ENSG00000182568	3
SATB2	ENSG00000119042	2
SBDS	ENSG00000126524	7
SBF1	ENSG00000100241	22
SC5D	ENSG00000109929	11
SCAF4	ENSG00000156304	21
SCAMP4	ENSG00000227500	19
SCAMP5	ENSG00000198794	15
SCAPER	ENSG00000140386	15
SCARB2	ENSG00000138760	4
SCARF2	ENSG00000244486	22
SCN1A	ENSG00000144285	2
SCN1B	ENSG00000105711	19
SCN2A	ENSG00000136531	2
SCN3A	ENSG00000153253	2
SCN4A	ENSG00000007314	17
SCN8A	ENSG00000196876	12
SCN9A	ENSG00000169432	2
SCO1	ENSG00000133028	17
SCO2	ENSG00000284194	22
SCUBE3	ENSG00000146197	6
SCYL1	ENSG00000142186	11
SDCCAG8	ENSG00000054282	1
SDHA	ENSG00000073578	5
SDHB	ENSG00000117118	1
SDHC	ENSG00000143252	1
SDHD	ENSG00000204370	11
SEC23B	ENSG00000101310	20
SEC24C	ENSG00000176986	10
SEC24D	ENSG00000150961	4
SELENOI	ENSG00000138018	2
SEMA3C	ENSG00000075223	7
SEMA3D	ENSG00000153993	7
SEMA3E	ENSG00000170381	7
SEMA4A	ENSG00000196189	1
SEMA5A	ENSG00000112902	5
SEMA6B	ENSG00000167680	19
SEPSECS	ENSG00000109618	4
SERAC1	ENSG00000122335	6
SET	ENSG00000119335	9
SETBP1	ENSG00000152217	18
SETD1A	ENSG00000099381	16
SETD1B	ENSG00000139718	12
SETD2	ENSG00000181555	3
SETD5	ENSG00000168137	3
SFXN4	ENSG00000183605	10
SGPL1	ENSG00000166224	10
SGSH	ENSG00000181523	17
SH2B1	ENSG00000178188	16
SH3BP4	ENSG00000130147	2
SHANK1	ENSG00000161681	19
SHANK2	ENSG00000162105	11
[truncated: 538 more rows]
